# Supplementary material for: Maternal mood disorders are associated with increased proportion of placental immune cell types driving gene expression differences
Source: Research Square preprint supplement (doi:10.21203/rs.3.rs-7773893/v1), 2025-11-23
Supplement: Supplementary file 1 [file a540973b2a31dd686dae8f21.docx]

**Supplementary Information**

[Supplementary Table 1 2](#_Toc209607145)

[Supplementary Table 2 3](#_Toc209607146)

[Supplementary Table 3 9](#_Toc209607147)

[Supplementary Table 4 11](#_Toc209607148)

[Supplementary Table 5 13](#_Toc209607149)

[Supplementary Figure 1 14](#_Toc209607150)

[Supplementary Figure 2 15](#_Toc209607151)

[Supplementary Figure 3 16](#_Toc209607152)

[Supplementary Figure 4 17](#_Toc209607153)

**Supplementary Table 1**

| **Supplementary Table 1. Characteristics of the sample with transcriptomic data versus no transcriptomic data.** | | | | | | |
| --- | --- | --- | --- | --- | --- | --- |
| Chromosomal testing arm; transcriptomic data or not |  |  |  | All participants;  transcriptomic data or not |  |  |
|  | **CVS sample with transcriptomic data (n=267)** | **No CVS transcriptomic data (n=277)** |  | **Placental transcriptomic data (n=493)** | **No placental transcriptomic data (n=450)** |  |
| **Maternal characteristics** |  |  | p-value |  |  | p-value |
| Age at delivery, years, mean (SD) | 35.1 (5.7) | 36.0 (5.2) | **0.042** | 34.6 (4.8) | 34.9 (5.3) | 0.290 |
| Early-pregnancy BMI, mean (SD) | 24.2 (4.3) | 25.0 (4.8) | **0.037** | 23.8 (4.1) | 24.5 (4.4) | **0.023** |
| Caesarean section, n (%) | 59 (22.1%) | 61 (22.0%) | 0.983 | 90 (18.3%) | 109 (24.2%) | **0.025** |
| In chromosomal testing arm, n (%) |  |  |  | 198 (40.2%) | 346 (76.9%) | **4,09E-30** |
| **Child characteristics** |  |  |  |  |  |  |
| Sex, female, n (%) | 125 (46.8%) | 131 (47.3%) | 0.911 | 242 (49.1%) | 218 (48.4%) | 0.844 |
| Preterm birth (<37 weeks), n (%) | 12 (4.5%) | 21 (7.6%) | 0.132 | 18 (3.7%) | 28 (6.2%) | 0.067 |

**Supplementary Table 2**

| **Supplementary Table 2. Differentially expressed genes (pFDR < 0.1) in the birth placenta between mothers with a history of depression or anxiety disorder diagnoses and those who did not have a history of mental disorders up to delivery.** | | | | | | | |
| --- | --- | --- | --- | --- | --- | --- | --- |
| **Gene** | **symbol** | **baseMean** | **log2FoldChange** | **lfcSE** | **stat** | **pvalue** | **padj** |
| ENSG00000008128 | CDK11A | 56,91 | 0,4634 | 0,12 | 3,85 | 0,000118 | 0,009554 |
| ENSG00000028137 | TNFRSF1B | 115,37 | 0,8777 | 0,143 | 6,125 | 9,06E-10 | 7,47E-07 |
| ENSG00000117298 | ECE1 | 107,48 | 0,5127 | 0,15 | 3,417 | 0,000633 | 0,03526 |
| ENSG00000117614 | SYF2 | 479,41 | 0,1439 | 0,043 | 3,314 | 0,000919 | 0,04563 |
| ENSG00000159023 | EPB41 | 313,52 | 0,5223 | 0,121 | 4,322 | 1,55E-05 | 0,002013 |
| ENSG00000116350 | SRSF4 | 671,49 | 0,2386 | 0,064 | 3,741 | 0,000183 | 0,01386 |
| ENSG00000184007 | PTP4A2 | 549,88 | 0,1399 | 0,044 | 3,174 | 0,001503 | 0,06349 |
| ENSG00000117411 | B4GALT2 | 56,73 | 0,2811 | 0,095 | 2,951 | 0,003171 | 0,09921 |
| ENSG00000085998 | POMGNT1 | 85,79 | -0,2619 | 0,078 | -3,364 | 0,000767 | 0,03999 |
| ENSG00000184292 | TACSTD2 | 148,81 | 0,6639 | 0,184 | 3,605 | 0,000312 | 0,02081 |
| ENSG00000121957 | GPSM2 | 67,12 | 0,3816 | 0,112 | 3,42 | 0,000626 | 0,03511 |
| ENSG00000197780 | TAF13 | 279,82 | 0,2305 | 0,067 | 3,454 | 0,000552 | 0,03206 |
| ENSG00000065135 | GNAI3 | 226,68 | 0,2101 | 0,046 | 4,579 | 4,67E-06 | 0,000701 |
| ENSG00000197747 | S100A10 | 855,09 | 0,4452 | 0,131 | 3,406 | 0,00066 | 0,0363 |
| ENSG00000163220 | S100A9 | 1425,76 | 0,5822 | 0,114 | 5,101 | 3,37E-07 | 8,42E-05 |
| ENSG00000163221 | S100A12 | 112,82 | 0,8384 | 0,179 | 4,696 | 2,65E-06 | 0,000465 |
| ENSG00000143546 | S100A8 | 881,11 | 0,459 | 0,153 | 3,007 | 0,002635 | 0,08833 |
| ENSG00000143614 | GATAD2B | 184,11 | 0,2324 | 0,073 | 3,192 | 0,001411 | 0,06059 |
| ENSG00000160712 | IL6R | 52,46 | 0,7532 | 0,16 | 4,711 | 2,47E-06 | 0,000443 |
| ENSG00000163479 | SSR2 | 258,13 | 0,1551 | 0,052 | 3,009 | 0,002623 | 0,08828 |
| ENSG00000186517 | ARHGAP30 | 66,83 | 0,5715 | 0,147 | 3,883 | 0,000103 | 0,008677 |
| ENSG00000143322 | ABL2 | 90,71 | 0,5172 | 0,1 | 5,178 | 2,24E-07 | 5,78E-05 |
| ENSG00000058085 | LAMC2 | 57,67 | 0,465 | 0,156 | 2,972 | 0,00296 | 0,09497 |
| ENSG00000135842 | NIBAN1 | 162,27 | 1,1907 | 0,169 | 7,03 | 2,07E-12 | 4,27E-09 |
| ENSG00000116679 | IVNS1ABP | 352,97 | 0,4598 | 0,087 | 5,296 | 1,18E-07 | 3,61E-05 |
| ENSG00000116741 | RGS2 | 325,32 | 0,518 | 0,124 | 4,162 | 3,16E-05 | 0,003427 |
| ENSG00000081237 | PTPRC | 146,9 | 0,4503 | 0,117 | 3,856 | 0,000115 | 0,009503 |
| ENSG00000118197 | DDX59 | 117,77 | -0,2158 | 0,072 | -2,985 | 0,002837 | 0,09283 |
| ENSG00000058668 | ATP2B4 | 352,34 | 0,284 | 0,091 | 3,138 | 0,001701 | 0,0681 |
| ENSG00000118873 | RAB3GAP2 | 284,75 | 0,2263 | 0,062 | 3,641 | 0,000272 | 0,01898 |
| ENSG00000115241 | PPM1G | 143,39 | 0,3162 | 0,078 | 4,051 | 5,11E-05 | 0,005137 |
| ENSG00000075426 | FOSL2 | 314,89 | 0,3703 | 0,107 | 3,47 | 0,00052 | 0,03061 |
| ENSG00000239332 | LINC01119 | 43,45 | -0,4158 | 0,129 | -3,234 | 0,00122 | 0,05497 |
| ENSG00000162924 | REL | 123,03 | 0,3684 | 0,091 | 4,04 | 5,34E-05 | 0,005266 |
| ENSG00000115956 | PLEK | 98,48 | 1,1384 | 0,182 | 6,251 | 4,08E-10 | 3,74E-07 |
| ENSG00000071054 | MAP4K4 | 204,46 | 0,5595 | 0,101 | 5,544 | 2,95E-08 | 1,14E-05 |
| ENSG00000115590 | IL1R2 | 112,37 | 1,104 | 0,21 | 5,261 | 1,43E-07 | 3,94E-05 |
| ENSG00000169756 | LIMS1 | 304,29 | 0,2829 | 0,083 | 3,426 | 0,000613 | 0,03464 |
| ENSG00000211460 | TSN | 210,66 | 0,1766 | 0,06 | 2,961 | 0,003062 | 0,09711 |
| ENSG00000169554 | ZEB2 | 153,39 | 0,529 | 0,128 | 4,149 | 3,34E-05 | 0,003577 |
| ENSG00000115221 | ITGB6 | 132,53 | 0,5836 | 0,197 | 2,966 | 0,00302 | 0,09613 |
| ENSG00000091436 | MAP3K20 | 101,07 | 0,3323 | 0,105 | 3,159 | 0,001584 | 0,06496 |
| ENSG00000082153 | BZW1 | 286,63 | 0,205 | 0,061 | 3,372 | 0,000748 | 0,03951 |
| ENSG00000079308 | TNS1 | 241,59 | 0,3972 | 0,133 | 2,993 | 0,002758 | 0,09099 |
| ENSG00000180871 | CXCR2 | 77,21 | 0,6797 | 0,164 | 4,144 | 3,41E-05 | 0,003609 |
| ENSG00000163466 | ARPC2 | 1475,23 | 0,2908 | 0,056 | 5,179 | 2,23E-07 | 5,78E-05 |
| ENSG00000018280 | SLC11A1 | 148,37 | 1,7303 | 0,17 | 10,19 | 2,19E-24 | 1,81E-20 |
| ENSG00000144567 | RETREG2 | 142,16 | 0,1798 | 0,054 | 3,328 | 0,000875 | 0,04451 |
| ENSG00000135899 | SP110 | 115,06 | 0,3998 | 0,105 | 3,807 | 0,000141 | 0,01093 |
| ENSG00000115053 | NCL | 977,1 | 0,1901 | 0,057 | 3,315 | 0,000916 | 0,04563 |
| ENSG00000124831 | LRRFIP1 | 516,43 | 0,3257 | 0,092 | 3,524 | 0,000425 | 0,02575 |
| ENSG00000198218 | QRICH1 | 118,37 | -0,2025 | 0,061 | -3,31 | 0,000932 | 0,0457 |
| ENSG00000188315 | C3orf62 | 48,15 | 0,4912 | 0,104 | 4,713 | 2,45E-06 | 0,000443 |
| ENSG00000272886 | DCP1A | 228,65 | 0,2894 | 0,062 | 4,661 | 3,14E-06 | 0,000529 |
| ENSG00000136068 | FLNB | 318,19 | 0,5316 | 0,134 | 3,954 | 7,69E-05 | 0,006889 |
| ENSG00000114861 | FOXP1 | 243,2 | 0,4469 | 0,098 | 4,545 | 5,5E-06 | 0,00081 |
| ENSG00000170017 | ALCAM | 120,9 | 0,6592 | 0,203 | 3,249 | 0,001156 | 0,05297 |
| ENSG00000114626 | ABTB1 | 37,04 | 0,5193 | 0,124 | 4,181 | 2,9E-05 | 0,003301 |
| ENSG00000175066 | GK5 | 73,39 | 0,4643 | 0,108 | 4,308 | 1,65E-05 | 0,00209 |
| ENSG00000114850 | SSR3 | 379,62 | 0,2263 | 0,067 | 3,386 | 0,000709 | 0,03822 |
| ENSG00000168827 | GFM1 | 150,57 | -0,1901 | 0,06 | -3,167 | 0,001543 | 0,06391 |
| ENSG00000163558 | PRKCI | 48,72 | -0,3302 | 0,105 | -3,143 | 0,001672 | 0,06756 |
| ENSG00000161217 | PCYT1A | 104,79 | 0,2765 | 0,084 | 3,287 | 0,001014 | 0,04788 |
| ENSG00000251615 |  | 53,72 | -0,4096 | 0,104 | -3,925 | 8,66E-05 | 0,007437 |
| ENSG00000038219 | BOD1L1 | 555,9 | 0,1949 | 0,059 | 3,303 | 0,000957 | 0,04639 |
| ENSG00000132466 | ANKRD17 | 351,52 | 0,3009 | 0,085 | 3,558 | 0,000374 | 0,02366 |
| ENSG00000109321 | AREG | 482,05 | 0,6413 | 0,2 | 3,209 | 0,00133 | 0,05891 |
| ENSG00000138814 | PPP3CA | 259,94 | 0,2541 | 0,083 | 3,061 | 0,002205 | 0,08008 |
| ENSG00000151726 | ACSL1 | 87 | 0,61 | 0,136 | 4,495 | 6,95E-06 | 0,001006 |
| ENSG00000145555 | MYO10 | 98,58 | 0,5338 | 0,115 | 4,639 | 3,51E-06 | 0,000567 |
| ENSG00000176788 | BASP1 | 1513,38 | 0,4189 | 0,085 | 4,954 | 7,25E-07 | 0,000171 |
| ENSG00000082074 | FYB1 | 213,24 | 0,5992 | 0,109 | 5,499 | 3,81E-08 | 1,31E-05 |
| ENSG00000145685 | LHFPL2 | 117,97 | 0,3038 | 0,092 | 3,298 | 0,000973 | 0,04691 |
| ENSG00000038427 | VCAN | 399,54 | 0,6867 | 0,15 | 4,591 | 4,42E-06 | 0,000675 |
| ENSG00000153113 | CAST | 1223,73 | 0,1613 | 0,054 | 2,993 | 0,002759 | 0,09099 |
| ENSG00000120738 | EGR1 | 265,95 | 0,6816 | 0,205 | 3,324 | 0,000889 | 0,04496 |
| ENSG00000145901 | TNIP1 | 141,42 | 0,3467 | 0,078 | 4,448 | 8,67E-06 | 0,001212 |
| ENSG00000164609 | SLU7 | 402,94 | 0,2538 | 0,058 | 4,389 | 1,14E-05 | 0,001515 |
| ENSG00000043462 | LCP2 | 54,17 | 0,7047 | 0,146 | 4,814 | 1,48E-06 | 0,000298 |
| ENSG00000072786 | STK10 | 127,07 | 0,368 | 0,079 | 4,676 | 2,93E-06 | 0,000503 |
| ENSG00000196923 | PDLIM7 | 43,54 | 0,5833 | 0,162 | 3,611 | 0,000305 | 0,02063 |
| ENSG00000111859 | NEDD9 | 387,54 | 0,278 | 0,087 | 3,187 | 0,001435 | 0,06099 |
| ENSG00000137177 | KIF13A | 136,32 | 0,2353 | 0,077 | 3,043 | 0,002342 | 0,08242 |
| ENSG00000124795 | DEK | 583,54 | 0,1916 | 0,053 | 3,648 | 0,000264 | 0,01863 |
| ENSG00000124766 | SOX4 | 201,89 | 0,4178 | 0,139 | 3,012 | 0,002597 | 0,08774 |
| ENSG00000111913 | RIPOR2 | 658,1 | 0,3872 | 0,087 | 4,435 | 9,19E-06 | 0,001251 |
| ENSG00000079691 | CARMIL1 | 45,03 | 0,4082 | 0,133 | 3,077 | 0,002089 | 0,07844 |
| ENSG00000112763 | BTN2A1 | 61,68 | 0,3265 | 0,103 | 3,164 | 0,001557 | 0,0642 |
| ENSG00000137331 | IER3 | 519,27 | 0,4839 | 0,144 | 3,363 | 0,000771 | 0,03999 |
| ENSG00000137411 | VARS2 | 55,65 | 0,4604 | 0,128 | 3,602 | 0,000316 | 0,02084 |
| ENSG00000096060 | FKBP5 | 68,34 | 0,5438 | 0,177 | 3,077 | 0,002093 | 0,07844 |
| ENSG00000112715 | VEGFA | 97,79 | 0,6728 | 0,183 | 3,68 | 0,000233 | 0,01702 |
| ENSG00000096384 | HSP90AB1 | 2434,05 | 0,3235 | 0,073 | 4,461 | 8,17E-06 | 0,001161 |
| ENSG00000151914 | DST | 229,87 | 0,4543 | 0,123 | 3,699 | 0,000216 | 0,0162 |
| ENSG00000277443 | MARCKS | 2796,37 | 0,2286 | 0,066 | 3,451 | 0,000558 | 0,03215 |
| ENSG00000118503 | TNFAIP3 | 320,43 | 0,7461 | 0,135 | 5,531 | 3,18E-08 | 1,14E-05 |
| ENSG00000112096 | SOD2 | 114,39 | 1,2022 | 0,177 | 6,785 | 1,16E-11 | 1,59E-08 |
| ENSG00000005020 | SKAP2 | 116,38 | 0,2918 | 0,074 | 3,963 | 7,39E-05 | 0,006714 |
| ENSG00000106080 | FKBP14 | 67,54 | 0,4154 | 0,127 | 3,27 | 0,001076 | 0,04984 |
| ENSG00000196313 | POM121 | 35,2 | 0,3961 | 0,126 | 3,147 | 0,001648 | 0,06695 |
| ENSG00000127946 | HIP1 | 40,28 | 0,4525 | 0,147 | 3,074 | 0,002115 | 0,07879 |
| ENSG00000257923 | CUX1 | 404,67 | 0,2173 | 0,068 | 3,2 | 0,001376 | 0,06036 |
| ENSG00000105835 | NAMPT | 430,23 | 0,5475 | 0,128 | 4,268 | 1,97E-05 | 0,002352 |
| ENSG00000105993 | DNAJB6 | 178,74 | 0,2685 | 0,064 | 4,167 | 3,09E-05 | 0,003424 |
| ENSG00000158526 | TSR2 | 91,32 | 0,1998 | 0,066 | 3,05 | 0,002292 | 0,08145 |
| ENSG00000147065 | MSN | 180,9 | 0,7925 | 0,142 | 5,598 | 2,16E-08 | 9,39E-06 |
| ENSG00000102024 | PLS3 | 80,77 | 0,5714 | 0,183 | 3,122 | 0,001794 | 0,07073 |
| ENSG00000134590 | RTL8C | 250,63 | 0,257 | 0,071 | 3,604 | 0,000313 | 0,02081 |
| ENSG00000203879 | GDI1 | 98,51 | 0,2357 | 0,079 | 2,98 | 0,002882 | 0,09355 |
| ENSG00000147324 | MFHAS1 | 131,05 | 0,3066 | 0,1 | 3,059 | 0,002221 | 0,08025 |
| ENSG00000104635 | SLC39A14 | 102,22 | 0,5519 | 0,186 | 2,967 | 0,003009 | 0,09613 |
| ENSG00000147454 | SLC25A37 | 1392,07 | 0,4859 | 0,112 | 4,32 | 1,56E-05 | 0,002013 |
| ENSG00000168172 | HOOK3 | 577,48 | 0,2901 | 0,07 | 4,165 | 3,12E-05 | 0,003424 |
| ENSG00000147676 | MAL2 | 160,98 | 0,4866 | 0,154 | 3,169 | 0,00153 | 0,06371 |
| ENSG00000176853 | FAM91A1 | 185,88 | -0,2205 | 0,065 | -3,415 | 0,000637 | 0,03526 |
| ENSG00000173334 | TRIB1 | 205,84 | 0,3799 | 0,113 | 3,375 | 0,000738 | 0,03927 |
| ENSG00000155926 | SLA | 52,94 | 0,7973 | 0,157 | 5,077 | 3,84E-07 | 9,31E-05 |
| ENSG00000198876 | DCAF12 | 455,36 | 0,2181 | 0,071 | 3,066 | 0,002173 | 0,07961 |
| ENSG00000136938 | ANP32B | 633,32 | 0,1964 | 0,05 | 3,931 | 8,47E-05 | 0,007346 |
| ENSG00000148153 | INIP | 74,6 | 0,383 | 0,1 | 3,835 | 0,000126 | 0,01007 |
| ENSG00000106948 | AKNA | 43,66 | 0,4805 | 0,15 | 3,193 | 0,001408 | 0,06059 |
| ENSG00000204148 | LINC00474 | 114,62 | -0,523 | 0,132 | -3,968 | 7,26E-05 | 0,006714 |
| ENSG00000186350 | RXRA | 275,72 | 0,4569 | 0,093 | 4,91 | 9,11E-07 | 0,000203 |
| ENSG00000175390 | EIF3F | 89,46 | -0,2784 | 0,093 | -2,982 | 0,00286 | 0,09319 |
| ENSG00000133805 | AMPD3 | 50,3 | 0,4231 | 0,115 | 3,695 | 0,00022 | 0,01633 |
| ENSG00000166788 | SAAL1 | 39,69 | -0,3355 | 0,11 | -3,042 | 0,002349 | 0,08242 |
| ENSG00000026508 | CD44 | 227,04 | 0,3515 | 0,11 | 3,196 | 0,001393 | 0,06059 |
| ENSG00000166326 | TRIM44 | 237,09 | 0,2041 | 0,06 | 3,377 | 0,000732 | 0,03919 |
| ENSG00000085117 | CD82 | 101,19 | 0,9935 | 0,173 | 5,754 | 8,7E-09 | 4,78E-06 |
| ENSG00000167996 | FTH1 | 1165,76 | 0,7365 | 0,124 | 5,954 | 2,61E-09 | 1,79E-06 |
| ENSG00000124942 | AHNAK | 1871,74 | 0,2944 | 0,069 | 4,274 | 1,92E-05 | 0,002352 |
| ENSG00000149781 | FERMT3 | 43,09 | 0,6059 | 0,148 | 4,106 | 4,02E-05 | 0,004095 |
| ENSG00000110047 | EHD1 | 387,97 | 0,2884 | 0,081 | 3,566 | 0,000363 | 0,02335 |
| ENSG00000251562 | MALAT1 | 23911,11 | 0,3756 | 0,094 | 3,998 | 6,38E-05 | 0,006187 |
| ENSG00000110092 | CCND1 | 124,7 | 0,4575 | 0,148 | 3,087 | 0,002022 | 0,07718 |
| ENSG00000137699 | TRIM29 | 159,55 | 0,3322 | 0,108 | 3,08 | 0,00207 | 0,07844 |
| ENSG00000137642 | SORL1 | 111,79 | 0,5289 | 0,148 | 3,575 | 0,00035 | 0,02288 |
| ENSG00000170325 | PRDM10 | 47,53 | 0,3097 | 0,095 | 3,271 | 0,001072 | 0,04984 |
| ENSG00000067082 | KLF6 | 555,33 | 0,324 | 0,106 | 3,069 | 0,002151 | 0,07918 |
| ENSG00000123240 | OPTN | 326,16 | 0,552 | 0,1 | 5,539 | 3,05E-08 | 1,14E-05 |
| ENSG00000197321 | SVIL | 63,8 | 0,3564 | 0,113 | 3,142 | 0,001681 | 0,0676 |
| ENSG00000122862 | SRGN | 597,65 | 0,5027 | 0,139 | 3,616 | 0,000299 | 0,02057 |
| ENSG00000166295 | ANAPC16 | 247,99 | 0,2231 | 0,058 | 3,829 | 0,000129 | 0,01011 |
| ENSG00000196968 | FUT11 | 133,45 | 0,3209 | 0,095 | 3,388 | 0,000705 | 0,03822 |
| ENSG00000108179 | PPIF | 95,29 | 0,5398 | 0,114 | 4,737 | 2,16E-06 | 0,000406 |
| ENSG00000108219 | TSPAN14 | 393,87 | 0,2383 | 0,081 | 2,95 | 0,003177 | 0,09921 |
| ENSG00000132334 | PTPRE | 85,74 | 0,6191 | 0,114 | 5,439 | 5,37E-08 | 1,71E-05 |
| ENSG00000151651 | ADAM8 | 74,12 | 0,4807 | 0,14 | 3,441 | 0,00058 | 0,033 |
| ENSG00000067182 | TNFRSF1A | 340,35 | 0,2462 | 0,059 | 4,179 | 2,92E-05 | 0,003301 |
| ENSG00000159335 | PTMS | 149,17 | 0,6608 | 0,142 | 4,65 | 3,31E-06 | 0,000546 |
| ENSG00000059804 | SLC2A3 | 301,67 | 1,0526 | 0,177 | 5,96 | 2,52E-09 | 1,79E-06 |
| ENSG00000166532 | RIMKLB | 314,79 | -0,2298 | 0,065 | -3,549 | 0,000387 | 0,0239 |
| ENSG00000139083 | ETV6 | 70,98 | 0,3664 | 0,108 | 3,403 | 0,000667 | 0,03644 |
| ENSG00000134531 | EMP1 | 604,59 | 0,7107 | 0,221 | 3,218 | 0,001289 | 0,05775 |
| ENSG00000198001 | IRAK4 | 87,17 | -0,2165 | 0,069 | -3,122 | 0,001798 | 0,07073 |
| ENSG00000111424 | VDR | 41,12 | 0,3694 | 0,12 | 3,077 | 0,002089 | 0,07844 |
| ENSG00000066117 | SMARCD1 | 45,93 | -0,2899 | 0,089 | -3,254 | 0,001137 | 0,05236 |
| ENSG00000167768 | KRT1 | 150,14 | 0,651 | 0,185 | 3,515 | 0,000439 | 0,02643 |
| ENSG00000166987 | MBD6 | 289,32 | -0,2109 | 0,066 | -3,212 | 0,001318 | 0,05876 |
| ENSG00000133858 | ZFC3H1 | 251,29 | 0,2767 | 0,075 | 3,688 | 0,000226 | 0,01662 |
| ENSG00000187109 | NAP1L1 | 551,11 | 0,3099 | 0,075 | 4,122 | 3,75E-05 | 0,003913 |
| ENSG00000070961 | ATP2B1 | 325,86 | 0,8549 | 0,113 | 7,548 | 4,42E-14 | 1,82E-10 |
| ENSG00000136040 | PLXNC1 | 56,08 | 0,4417 | 0,144 | 3,064 | 0,002185 | 0,07972 |
| ENSG00000166598 | HSP90B1 | 3562,13 | 0,198 | 0,056 | 3,505 | 0,000456 | 0,02724 |
| ENSG00000075856 | SART3 | 144,79 | 0,1994 | 0,058 | 3,446 | 0,000569 | 0,03258 |
| ENSG00000111412 | SPRING1 | 56,14 | 0,2784 | 0,087 | 3,208 | 0,001336 | 0,05891 |
| ENSG00000081760 | AACS | 105,73 | 0,2416 | 0,079 | 3,054 | 0,002259 | 0,08063 |
| ENSG00000176915 | ANKLE2 | 171,67 | 0,2894 | 0,068 | 4,27 | 1,96E-05 | 0,002352 |
| ENSG00000122042 | UBL3 | 241,67 | 0,329 | 0,11 | 3,002 | 0,00268 | 0,08947 |
| ENSG00000132965 | ALOX5AP | 116,83 | 0,8525 | 0,15 | 5,699 | 1,2E-08 | 6,2E-06 |
| ENSG00000120688 | WBP4 | 265,09 | 0,1843 | 0,06 | 3,073 | 0,002121 | 0,07879 |
| ENSG00000123200 | ZC3H13 | 342,03 | 0,2233 | 0,059 | 3,789 | 0,000151 | 0,01154 |
| ENSG00000136153 | LMO7 | 224,82 | 0,4276 | 0,118 | 3,611 | 0,000305 | 0,02063 |
| ENSG00000125266 | EFNB2 | 45,89 | 0,4949 | 0,139 | 3,548 | 0,000388 | 0,0239 |
| ENSG00000129566 | TEP1 | 36,46 | 0,7331 | 0,153 | 4,79 | 1,67E-06 | 0,000319 |
| ENSG00000198604 | BAZ1A | 199,03 | 0,3175 | 0,082 | 3,855 | 0,000116 | 0,009503 |
| ENSG00000165525 | NEMF | 322,84 | 0,1739 | 0,058 | 2,973 | 0,002947 | 0,09492 |
| ENSG00000133961 | NUMB | 128,34 | 0,4961 | 0,088 | 5,651 | 1,59E-08 | 7,3E-06 |
| ENSG00000197176 | LINC02291 | 228,48 | -0,5081 | 0,134 | -3,802 | 0,000144 | 0,01108 |
| ENSG00000080824 | HSP90AA1 | 7918,08 | 0,5891 | 0,104 | 5,681 | 1,34E-08 | 6,5E-06 |
| ENSG00000185215 | TNFAIP2 | 342,01 | 0,7485 | 0,154 | 4,858 | 1,19E-06 | 0,000245 |
| ENSG00000140199 | SLC12A6 | 73,98 | 0,7785 | 0,131 | 5,923 | 3,17E-09 | 2,01E-06 |
| ENSG00000140259 | MFAP1 | 170,42 | 0,1828 | 0,061 | 2,978 | 0,002905 | 0,09394 |
| ENSG00000138594 | TMOD3 | 291,11 | 0,348 | 0,088 | 3,963 | 7,41E-05 | 0,006714 |
| ENSG00000069974 | RAB27A | 73,07 | 0,4552 | 0,099 | 4,593 | 4,37E-06 | 0,000675 |
| ENSG00000137831 | UACA | 82,28 | 0,4472 | 0,151 | 2,956 | 0,003121 | 0,09821 |
| ENSG00000137868 | STRA6 | 477,07 | -0,2015 | 0,065 | -3,118 | 0,001819 | 0,07107 |
| ENSG00000140563 | MCTP2 | 67,72 | 0,3702 | 0,122 | 3,026 | 0,002479 | 0,0848 |
| ENSG00000188536 | HBA2 | 70209,63 | 0,4168 | 0,135 | 3,096 | 0,001958 | 0,07535 |
| ENSG00000206172 | HBA1 | 12495,35 | 0,5257 | 0,143 | 3,673 | 0,00024 | 0,01735 |
| ENSG00000180185 | FAHD1 | 70,84 | 0,2665 | 0,085 | 3,117 | 0,001828 | 0,0711 |
| ENSG00000188215 | DCUN1D3 | 42,32 | 0,5579 | 0,106 | 5,28 | 1,29E-07 | 3,78E-05 |
| ENSG00000168447 | SCNN1B | 69,67 | -0,3319 | 0,112 | -2,958 | 0,003092 | 0,09767 |
| ENSG00000169221 | TBC1D10B | 71,96 | 0,3886 | 0,109 | 3,557 | 0,000375 | 0,02366 |
| ENSG00000083799 | CYLD | 112,97 | 0,3274 | 0,092 | 3,548 | 0,000389 | 0,0239 |
| ENSG00000087263 | OGFOD1 | 77,03 | 0,3192 | 0,101 | 3,153 | 0,001615 | 0,06591 |
| ENSG00000102931 | ARL2BP | 67,45 | 0,2523 | 0,083 | 3,043 | 0,002344 | 0,08242 |
| ENSG00000217555 | CKLF | 56,5 | 0,3324 | 0,107 | 3,096 | 0,001965 | 0,07535 |
| ENSG00000102974 | CTCF | 304,06 | 0,195 | 0,064 | 3,03 | 0,002446 | 0,0844 |
| ENSG00000158545 | ZC3H18 | 137,73 | 0,2671 | 0,079 | 3,365 | 0,000766 | 0,03999 |
| ENSG00000167522 | ANKRD11 | 307,9 | 0,2273 | 0,075 | 3,016 | 0,002561 | 0,08726 |
| ENSG00000129250 | KIF1C | 129,17 | 0,3149 | 0,096 | 3,27 | 0,001076 | 0,04984 |
| ENSG00000132510 | KDM6B | 98 | 0,3013 | 0,094 | 3,194 | 0,001402 | 0,06059 |
| ENSG00000034152 | MAP2K3 | 321,32 | 0,2746 | 0,085 | 3,237 | 0,001208 | 0,05471 |
| ENSG00000109111 | SUPT6H | 169,03 | 0,2213 | 0,072 | 3,058 | 0,002229 | 0,08025 |
| ENSG00000275023 | MLLT6 | 184,68 | 0,4125 | 0,1 | 4,109 | 3,97E-05 | 0,00409 |
| ENSG00000273559 | CWC25 | 177,63 | 0,2509 | 0,065 | 3,885 | 0,000102 | 0,008677 |
| ENSG00000131759 | RARA | 100,6 | 0,6962 | 0,128 | 5,438 | 5,39E-08 | 1,71E-05 |
| ENSG00000168610 | STAT3 | 310,64 | 0,645 | 0,099 | 6,533 | 6,44E-11 | 7,58E-08 |
| ENSG00000177469 | CAVIN1 | 764,04 | 0,4752 | 0,112 | 4,259 | 2,06E-05 | 0,002422 |
| ENSG00000267121 | FMNL1-DT | 58,62 | 0,6829 | 0,129 | 5,275 | 1,33E-07 | 3,78E-05 |
| ENSG00000184922 | FMNL1 | 100,7 | 0,8977 | 0,121 | 7,406 | 1,3E-13 | 3,57E-10 |
| ENSG00000225190 | PLEKHM1 | 46,68 | 0,3832 | 0,096 | 3,992 | 6,56E-05 | 0,006293 |
| ENSG00000141279 | NPEPPS | 559,56 | 0,1967 | 0,054 | 3,633 | 0,00028 | 0,0194 |
| ENSG00000008294 | SPAG9 | 363,52 | 0,3303 | 0,057 | 5,841 | 5,18E-09 | 3,05E-06 |
| ENSG00000166260 | COX11 | 33,71 | -0,3341 | 0,107 | -3,121 | 0,001801 | 0,07073 |
| ENSG00000154265 | ABCA5 | 259,21 | -0,2003 | 0,061 | -3,296 | 0,00098 | 0,04695 |
| ENSG00000170190 | SLC16A5 | 93,58 | -0,2766 | 0,084 | -3,312 | 0,000928 | 0,0457 |
| ENSG00000177885 | GRB2 | 386,13 | 0,3039 | 0,063 | 4,858 | 1,18E-06 | 0,000245 |
| ENSG00000185504 | FAAP100 | 36,21 | 0,3866 | 0,127 | 3,036 | 0,002394 | 0,08364 |
| ENSG00000132199 | ENOSF1 | 115,54 | -0,2726 | 0,078 | -3,479 | 0,000504 | 0,02988 |
| ENSG00000101745 | ANKRD12 | 842,02 | 0,1614 | 0,053 | 3,026 | 0,002477 | 0,0848 |
| ENSG00000177150 | FAM210A | 62,87 | 0,2469 | 0,081 | 3,032 | 0,002433 | 0,08428 |
| ENSG00000101654 | RNMT | 194,85 | 0,302 | 0,063 | 4,793 | 1,64E-06 | 0,000319 |
| ENSG00000067900 | ROCK1 | 303,65 | 0,2108 | 0,067 | 3,123 | 0,001793 | 0,07073 |
| ENSG00000101782 | RIOK3 | 495,79 | 0,2537 | 0,064 | 3,985 | 6,75E-05 | 0,006394 |
| ENSG00000134762 | DSC3 | 102,67 | 0,4138 | 0,133 | 3,108 | 0,001881 | 0,07282 |
| ENSG00000046604 | DSG2 | 407,19 | 0,3246 | 0,082 | 3,95 | 7,82E-05 | 0,006934 |
| ENSG00000101236 | RNF24 | 63,5 | 0,7953 | 0,164 | 4,86 | 1,18E-06 | 0,000245 |
| ENSG00000125844 | RRBP1 | 1418,49 | 0,2462 | 0,078 | 3,17 | 0,001527 | 0,06371 |
| ENSG00000025293 | PHF20 | 102,93 | 0,2916 | 0,08 | 3,651 | 0,000261 | 0,01854 |
| ENSG00000101347 | SAMHD1 | 176,28 | 0,403 | 0,124 | 3,244 | 0,00118 | 0,05376 |
| ENSG00000203880 | PCMTD2 | 135,15 | -0,2373 | 0,079 | -3,015 | 0,002572 | 0,08728 |
| ENSG00000099804 | CDC34 | 140,73 | 0,1949 | 0,061 | 3,189 | 0,001429 | 0,06099 |
| ENSG00000167470 | MIDN | 872,64 | 0,2958 | 0,075 | 3,966 | 7,32E-05 | 0,006714 |
| ENSG00000065000 | AP3D1 | 590,04 | 0,2215 | 0,066 | 3,337 | 0,000846 | 0,04333 |
| ENSG00000105355 | PLIN3 | 638,75 | 0,2477 | 0,072 | 3,458 | 0,000544 | 0,03182 |
| ENSG00000032444 | PNPLA6 | 48,8 | 0,4533 | 0,107 | 4,221 | 2,43E-05 | 0,002825 |
| ENSG00000076944 | STXBP2 | 68,78 | 0,5567 | 0,126 | 4,434 | 9,25E-06 | 0,001251 |
| ENSG00000130164 | LDLR | 167,56 | 0,4564 | 0,119 | 3,832 | 0,000127 | 0,01007 |
| ENSG00000171223 | JUNB | 922,8 | 0,3969 | 0,101 | 3,932 | 8,42E-05 | 0,007346 |
| ENSG00000141858 | SAMD1 | 66,98 | 0,3393 | 0,111 | 3,07 | 0,00214 | 0,07912 |
| ENSG00000074181 | NOTCH3 | 158,7 | 0,6674 | 0,188 | 3,556 | 0,000376 | 0,02366 |
| ENSG00000127528 | KLF2 | 209,49 | 0,4044 | 0,122 | 3,319 | 0,000904 | 0,04544 |
| ENSG00000196705 | ZNF431 | 63,65 | 0,3204 | 0,098 | 3,286 | 0,001016 | 0,04788 |
| ENSG00000089335 | ZNF302 | 153,49 | 0,5563 | 0,138 | 4,039 | 5,37E-05 | 0,005266 |
| ENSG00000272333 | KMT2B | 133,07 | 0,3299 | 0,092 | 3,569 | 0,000358 | 0,02325 |
| ENSG00000128016 | ZFP36 | 219,21 | 0,5611 | 0,146 | 3,854 | 0,000116 | 0,009503 |
| ENSG00000160410 | SHKBP1 | 37,63 | 0,4227 | 0,127 | 3,337 | 0,000846 | 0,04333 |
| ENSG00000011422 | PLAUR | 337,6 | 0,898 | 0,183 | 4,914 | 8,95E-07 | 0,000203 |
| ENSG00000007255 | TRAPPC6A | 53,75 | -0,3653 | 0,103 | -3,544 | 0,000394 | 0,02406 |
| ENSG00000104881 | PPP1R13L | 362,89 | 0,26 | 0,087 | 2,997 | 0,002725 | 0,0906 |
| ENSG00000130749 | ZC3H4 | 93,18 | 0,2594 | 0,085 | 3,055 | 0,00225 | 0,08063 |
| ENSG00000171051 | FPR1 | 108,48 | 0,9443 | 0,145 | 6,499 | 8,06E-11 | 8,31E-08 |
| ENSG00000213762 | ZNF134 | 43,72 | 0,2638 | 0,087 | 3,035 | 0,002408 | 0,08377 |
| ENSG00000198466 | ZNF587 | 230,48 | 0,4114 | 0,125 | 3,294 | 0,000989 | 0,04715 |
| ENSG00000177663 | IL17RA | 105,35 | 0,8925 | 0,131 | 6,812 | 9,62E-12 | 1,59E-08 |
| ENSG00000100055 | CYTH4 | 72,04 | 0,5672 | 0,132 | 4,286 | 1,82E-05 | 0,002271 |
| ENSG00000100221 | JOSD1 | 140,51 | 0,213 | 0,064 | 3,309 | 0,000937 | 0,0457 |
| ENSG00000100372 | SLC25A17 | 54,59 | 0,2976 | 0,081 | 3,67 | 0,000243 | 0,0174 |
| ENSG00000077942 | FBLN1 | 6817,39 | -0,2834 | 0,095 | -2,99 | 0,002792 | 0,09173 |
| ENSG00000025708 | TYMP | 90,52 | 0,8404 | 0,151 | 5,577 | 2,45E-08 | 1,01E-05 |
| ENSG00000155307 | SAMSN1 | 53,51 | 0,8196 | 0,177 | 4,617 | 3,88E-06 | 0,000616 |
| ENSG00000183067 | IGSF5 | 107,46 | -0,2927 | 0,092 | -3,173 | 0,001509 | 0,06349 |

**Supplementary Table 3**

| **Supplementary Table 3. Differentially expressed genes (pFDR < 0.1) in birth placenta between mothers whose mean depressive or anxiety symptoms across early, mid and late pregnancy were above compared with below the clinical cutoffs.** | | | | | | | |
| --- | --- | --- | --- | --- | --- | --- | --- |
| **Gene** | **symbol** | **baseMean** | **log2FoldChange** | **lfcSE** | **stat** | **pvalue** | **padj** |
| ENSG00000028137 | TNFRSF1B | 115,37 | 0,5909 | 0,119 | 4,966 | 6,85E-07 | 0,000471 |
| ENSG00000090621 | PABPC4 | 516,05 | 0,1774 | 0,049 | 3,635 | 0,000278 | 0,03881 |
| ENSG00000162645 | GBP2 | 197,67 | 0,2071 | 0,058 | 3,549 | 0,000386 | 0,04976 |
| ENSG00000163220 | S100A9 | 1425,76 | 0,3918 | 0,095 | 4,14 | 3,48E-05 | 0,009257 |
| ENSG00000163221 | S100A12 | 112,82 | 0,5395 | 0,147 | 3,658 | 0,000254 | 0,03612 |
| ENSG00000160712 | IL6R | 52,46 | 0,4631 | 0,133 | 3,49 | 0,000483 | 0,05775 |
| ENSG00000186517 | ARHGAP30 | 66,83 | 0,4788 | 0,12 | 4,006 | 6,16E-05 | 0,01411 |
| ENSG00000143322 | ABL2 | 90,71 | 0,3134 | 0,083 | 3,772 | 0,000162 | 0,02667 |
| ENSG00000116701 | NCF2 | 89,88 | 0,343 | 0,098 | 3,491 | 0,000481 | 0,05775 |
| ENSG00000135842 | NIBAN1 | 162,27 | 0,8039 | 0,141 | 5,716 | 1,09E-08 | 2,25E-05 |
| ENSG00000116679 | IVNS1ABP | 352,97 | 0,3285 | 0,072 | 4,578 | 4,69E-06 | 0,002147 |
| ENSG00000116741 | RGS2 | 325,32 | 0,4213 | 0,102 | 4,14 | 3,48E-05 | 0,009257 |
| ENSG00000162924 | REL | 123,03 | 0,2766 | 0,075 | 3,698 | 0,000217 | 0,03319 |
| ENSG00000115956 | PLEK | 98,48 | 0,6756 | 0,152 | 4,459 | 8,25E-06 | 0,002967 |
| ENSG00000115275 | MOGS | 219,27 | -0,1754 | 0,042 | -4,156 | 3,24E-05 | 0,009207 |
| ENSG00000071054 | MAP4K4 | 204,46 | 0,3382 | 0,084 | 4,03 | 5,57E-05 | 0,0135 |
| ENSG00000115590 | IL1R2 | 112,37 | 0,7604 | 0,173 | 4,385 | 1,16E-05 | 0,003817 |
| ENSG00000180871 | CXCR2 | 77,21 | 0,469 | 0,135 | 3,474 | 0,000513 | 0,06036 |
| ENSG00000163466 | ARPC2 | 1475,23 | 0,1867 | 0,046 | 4,024 | 5,73E-05 | 0,0135 |
| ENSG00000018280 | SLC11A1 | 148,37 | 1,1393 | 0,143 | 7,947 | 1,91E-15 | 1,58E-11 |
| ENSG00000124831 | LRRFIP1 | 516,43 | 0,2828 | 0,075 | 3,752 | 0,000175 | 0,0278 |
| ENSG00000091986 | CCDC80 | 189,48 | 0,4976 | 0,127 | 3,908 | 9,29E-05 | 0,01871 |
| ENSG00000175066 | GK5 | 73,39 | 0,315 | 0,089 | 3,542 | 0,000397 | 0,05029 |
| ENSG00000038219 | BOD1L1 | 555,89 | 0,1696 | 0,048 | 3,53 | 0,000416 | 0,05192 |
| ENSG00000176788 | BASP1 | 1513,38 | 0,2413 | 0,07 | 3,424 | 0,000616 | 0,06772 |
| ENSG00000082074 | FYB1 | 213,24 | 0,4315 | 0,09 | 4,797 | 1,61E-06 | 0,000948 |
| ENSG00000043462 | LCP2 | 54,17 | 0,4698 | 0,122 | 3,865 | 0,000111 | 0,02094 |
| ENSG00000137411 | VARS2 | 55,65 | 0,5134 | 0,103 | 4,974 | 6,55E-07 | 0,000471 |
| ENSG00000204482 | LST1 | 53,07 | 0,4364 | 0,112 | 3,908 | 9,3E-05 | 0,01871 |
| ENSG00000198663 | C6orf89 | 224,03 | 0,1925 | 0,05 | 3,835 | 0,000126 | 0,02201 |
| ENSG00000137161 | CNPY3 | 53,38 | 0,3567 | 0,097 | 3,664 | 0,000248 | 0,03586 |
| ENSG00000096384 | HSP90AB1 | 2434,05 | 0,2069 | 0,06 | 3,466 | 0,000529 | 0,06144 |
| ENSG00000118503 | TNFAIP3 | 320,43 | 0,5198 | 0,111 | 4,671 | 2,99E-06 | 0,001542 |
| ENSG00000112096 | SOD2 | 114,39 | 0,7942 | 0,148 | 5,383 | 7,32E-08 | 6,71E-05 |
| ENSG00000009335 | UBE3C | 254,73 | 0,1466 | 0,036 | 4,102 | 4,1E-05 | 0,01057 |
| ENSG00000102265 | TIMP1 | 443,51 | 1,1228 | 0,183 | 6,129 | 8,85E-10 | 3,65E-06 |
| ENSG00000147065 | MSN | 180,9 | 0,4063 | 0,118 | 3,452 | 0,000556 | 0,06192 |
| ENSG00000147454 | SLC25A37 | 1392,07 | 0,3571 | 0,092 | 3,864 | 0,000112 | 0,02094 |
| ENSG00000129292 | PHF20L1 | 265,63 | 0,1663 | 0,044 | 3,76 | 0,00017 | 0,02748 |
| ENSG00000155926 | SLA | 52,94 | 0,5005 | 0,13 | 3,858 | 0,000114 | 0,02094 |
| ENSG00000178719 | GRINA | 275,01 | 0,2209 | 0,062 | 3,561 | 0,00037 | 0,04916 |
| ENSG00000186350 | RXRA | 275,72 | 0,3574 | 0,076 | 4,673 | 2,97E-06 | 0,001542 |
| ENSG00000085117 | CD82 | 101,19 | 0,6375 | 0,143 | 4,458 | 8,28E-06 | 0,002967 |
| ENSG00000167996 | FTH1 | 1165,76 | 0,5977 | 0,101 | 5,891 | 3,83E-09 | 1,05E-05 |
| ENSG00000110047 | EHD1 | 387,97 | 0,2816 | 0,066 | 4,274 | 1,92E-05 | 0,006094 |
| ENSG00000087365 | SF3B2 | 519,4 | 0,193 | 0,055 | 3,52 | 0,000432 | 0,05316 |
| ENSG00000137642 | SORL1 | 111,79 | 0,4159 | 0,12 | 3,454 | 0,000553 | 0,06192 |
| ENSG00000123240 | OPTN | 326,16 | 0,3249 | 0,083 | 3,919 | 8,89E-05 | 0,01871 |
| ENSG00000108179 | PPIF | 95,29 | 0,5101 | 0,093 | 5,504 | 3,72E-08 | 4,34E-05 |
| ENSG00000132334 | PTPRE | 85,74 | 0,4204 | 0,094 | 4,474 | 7,68E-06 | 0,002967 |
| ENSG00000151651 | ADAM8 | 74,12 | 0,3784 | 0,114 | 3,306 | 0,000947 | 0,09882 |
| ENSG00000059804 | SLC2A3 | 301,67 | 0,6639 | 0,146 | 4,541 | 5,6E-06 | 0,002431 |
| ENSG00000070961 | ATP2B1 | 325,86 | 0,4207 | 0,095 | 4,41 | 1,04E-05 | 0,003556 |
| ENSG00000136026 | CKAP4 | 384,47 | 0,2526 | 0,066 | 3,825 | 0,000131 | 0,02246 |
| ENSG00000132965 | ALOX5AP | 116,83 | 0,6744 | 0,123 | 5,482 | 4,21E-08 | 4,34E-05 |
| ENSG00000129566 | TEP1 | 36,46 | 0,5022 | 0,127 | 3,966 | 7,31E-05 | 0,01587 |
| ENSG00000129474 | AJUBA | 44,3 | -0,4171 | 0,102 | -4,084 | 4,42E-05 | 0,01104 |
| ENSG00000165525 | NEMF | 322,84 | 0,1831 | 0,048 | 3,85 | 0,000118 | 0,02114 |
| ENSG00000133961 | NUMB | 128,34 | 0,2901 | 0,073 | 3,966 | 0,000073 | 0,01587 |
| ENSG00000080824 | HSP90AA1 | 7918,08 | 0,3879 | 0,086 | 4,498 | 6,87E-06 | 0,002833 |
| ENSG00000185215 | TNFAIP2 | 342,01 | 0,4411 | 0,127 | 3,461 | 0,000538 | 0,06159 |
| ENSG00000140199 | SLC12A6 | 73,98 | 0,3776 | 0,111 | 3,415 | 0,000638 | 0,06919 |
| ENSG00000170776 | AKAP13 | 483,53 | 0,228 | 0,062 | 3,683 | 0,00023 | 0,03391 |
| ENSG00000070770 | CSNK2A2 | 360,5 | -0,1456 | 0,044 | -3,331 | 0,000866 | 0,09218 |
| ENSG00000108518 | PFN1 | 1278,73 | 0,2298 | 0,06 | 3,861 | 0,000113 | 0,02094 |
| ENSG00000278053 | DDX52 | 109,23 | 0,2425 | 0,064 | 3,773 | 0,000162 | 0,02667 |
| ENSG00000131759 | RARA | 100,6 | 0,3986 | 0,106 | 3,744 | 0,000181 | 0,02815 |
| ENSG00000168610 | STAT3 | 310,64 | 0,4292 | 0,082 | 5,222 | 1,77E-07 | 0,000146 |
| ENSG00000184922 | FMNL1 | 100,7 | 0,5691 | 0,101 | 5,609 | 2,04E-08 | 2,8E-05 |
| ENSG00000101782 | RIOK3 | 495,79 | 0,1871 | 0,052 | 3,586 | 0,000336 | 0,04616 |
| ENSG00000101236 | RNF24 | 63,5 | 0,4525 | 0,136 | 3,329 | 0,000872 | 0,09218 |
| ENSG00000011422 | PLAUR | 337,6 | 0,6298 | 0,15 | 4,188 | 2,81E-05 | 0,00828 |
| ENSG00000171051 | FPR1 | 108,48 | 0,6765 | 0,12 | 5,626 | 1,85E-08 | 2,8E-05 |
| ENSG00000125505 | MBOAT7 | 151,61 | 0,2214 | 0,062 | 3,565 | 0,000365 | 0,04916 |
| ENSG00000063245 | EPN1 | 106,52 | 0,2674 | 0,072 | 3,692 | 0,000223 | 0,03337 |
| ENSG00000177663 | IL17RA | 105,35 | 0,5092 | 0,11 | 4,63 | 3,66E-06 | 0,001774 |
| ENSG00000100055 | CYTH4 | 72,04 | 0,3881 | 0,109 | 3,552 | 0,000382 | 0,04976 |
| ENSG00000025708 | TYMP | 90,52 | 0,6134 | 0,124 | 4,931 | 8,16E-07 | 0,000518 |
| ENSG00000155307 | SAMSN1 | 53,51 | 0,6142 | 0,146 | 4,2 | 2,67E-05 | 0,008147 |

**Supplementary Table 4**

| **Supplementary Table 4. Significantly enriched biological process GO terms (pFDR < 0.05) identified by enrichGO from 247 up-regulated differentially expressed genes.** | | | | | | | | | | | |
| --- | --- | --- | --- | --- | --- | --- | --- | --- | --- | --- | --- |
| **GO ID** | **GO Term** | **GeneRatio** | **BgRatio** | **RichFactor** | **FoldEnrichment** | **zScore** | **pvalue** | **FDR** | **qvalue** | **Count** | **geneRatio** |
| GO:0006954 | inflammatory response | 37/238 | 380/7646 | 0,09737 | 3,128 | 7,627 | 3,75E-10 | 1,19E-06 | 1,06E-06 | 37 | 37/238 |
| GO:0050727 | regulation of inflammatory response | 23/238 | 177/7646 | 0,1299 | 4,175 | 7,659 | 4,78E-09 | 7,6E-06 | 6,74E-06 | 23 | 23/238 |
| GO:0045321 | leukocyte activation | 38/238 | 462/7646 | 0,08225 | 2,642 | 6,527 | 2,47E-08 | 2,62E-05 | 2,32E-05 | 38 | 38/238 |
| GO:0050728 | negative regulation of inflammatory response | 13/238 | 77/7646 | 0,1688 | 5,424 | 6,993 | 5,81E-07 | 0,000462 | 0,00041 | 13 | 13/238 |
| GO:0046649 | lymphocyte activation | 31/238 | 393/7646 | 0,07888 | 2,534 | 5,597 | 1,39E-06 | 0,000882 | 0,000781 | 31 | 31/238 |
| GO:0098609 | cell-cell adhesion | 32/238 | 418/7646 | 0,07656 | 2,459 | 5,5 | 1,77E-06 | 0,000939 | 0,000832 | 32 | 32/238 |
| GO:0042110 | T cell activation | 23/238 | 274/7646 | 0,08394 | 2,697 | 5,126 | 1,29E-05 | 0,005872 | 0,005204 | 23 | 23/238 |
| GO:0045785 | positive regulation of cell adhesion | 22/238 | 258/7646 | 0,08527 | 2,739 | 5,094 | 1,57E-05 | 0,006212 | 0,005506 | 22 | 22/238 |
| GO:0031347 | regulation of defense response | 30/238 | 423/7646 | 0,07092 | 2,278 | 4,849 | 1,76E-05 | 0,006212 | 0,005506 | 30 | 30/238 |
| GO:0050729 | positive regulation of inflammatory response | 10/238 | 68/7646 | 0,1471 | 4,724 | 5,529 | 4,21E-05 | 0,01338 | 0,01186 | 10 | 10/238 |
| GO:0031348 | negative regulation of defense response | 14/238 | 135/7646 | 0,1037 | 3,332 | 4,899 | 7,31E-05 | 0,02037 | 0,01805 | 14 | 14/238 |
| GO:0010611 | regulation of cardiac muscle hypertrophy | 7/238 | 35/7646 | 0,2 | 6,425 | 5,766 | 8,27E-05 | 0,02037 | 0,01805 | 7 | 7/238 |
| GO:0034097 | response to cytokine | 31/238 | 482/7646 | 0,06432 | 2,066 | 4,334 | 8,32E-05 | 0,02037 | 0,01805 | 31 | 31/238 |
| GO:0051146 | striated muscle cell differentiation | 14/238 | 138/7646 | 0,1014 | 3,259 | 4,8 | 9,29E-05 | 0,02112 | 0,01872 | 14 | 14/238 |
| GO:0014743 | regulation of muscle hypertrophy | 7/238 | 36/7646 | 0,1944 | 6,247 | 5,656 | 1E-04 | 0,02122 | 0,01881 | 7 | 7/238 |
| GO:0007159 | leukocyte cell-cell adhesion | 18/238 | 213/7646 | 0,08451 | 2,715 | 4,55 | 0,000107 | 0,02131 | 0,01889 | 18 | 18/238 |
| GO:0030155 | regulation of cell adhesion | 28/238 | 424/7646 | 0,06604 | 2,122 | 4,259 | 0,00012 | 0,0215 | 0,01905 | 28 | 28/238 |
| GO:1901652 | response to peptide | 31/238 | 492/7646 | 0,06301 | 2,024 | 4,209 | 0,000122 | 0,0215 | 0,01905 | 31 | 31/238 |
| GO:0097530 | granulocyte migration | 9/238 | 63/7646 | 0,1429 | 4,589 | 5,127 | 0,000129 | 0,02156 | 0,01911 | 9 | 9/238 |
| GO:0071621 | granulocyte chemotaxis | 8/238 | 51/7646 | 0,1569 | 5,039 | 5,188 | 0,000157 | 0,02494 | 0,0221 | 8 | 8/238 |
| GO:0045597 | positive regulation of cell differentiation | 28/238 | 432/7646 | 0,06481 | 2,082 | 4,151 | 0,000165 | 0,02506 | 0,02221 | 28 | 28/238 |
| GO:0030595 | leukocyte chemotaxis | 11/238 | 97/7646 | 0,1134 | 3,643 | 4,696 | 0,000198 | 0,0286 | 0,02535 | 11 | 11/238 |
| GO:0042692 | muscle cell differentiation | 16/238 | 186/7646 | 0,08602 | 2,764 | 4,364 | 0,000212 | 0,0293 | 0,02597 | 16 | 16/238 |
| GO:0010614 | negative regulation of cardiac muscle hypertrophy | 5/238 | 19/7646 | 0,2632 | 8,454 | 5,831 | 0,000228 | 0,03021 | 0,02678 | 5 | 5/238 |
| GO:0050900 | leukocyte migration | 15/238 | 170/7646 | 0,08824 | 2,835 | 4,336 | 0,000253 | 0,03174 | 0,02813 | 15 | 15/238 |
| GO:0051017 | actin filament bundle assembly | 11/238 | 100/7646 | 0,11 | 3,534 | 4,571 | 0,000259 | 0,03174 | 0,02813 | 11 | 11/238 |
| GO:0014741 | negative regulation of muscle hypertrophy | 5/238 | 20/7646 | 0,25 | 8,032 | 5,643 | 0,000296 | 0,03366 | 0,02983 | 5 | 5/238 |
| GO:0051894 | positive regulation of focal adhesion assembly | 5/238 | 20/7646 | 0,25 | 8,032 | 5,643 | 0,000296 | 0,03366 | 0,02983 | 5 | 5/238 |
| GO:0061572 | actin filament bundle organization | 11/238 | 102/7646 | 0,1078 | 3,465 | 4,491 | 0,000309 | 0,03389 | 0,03004 | 11 | 11/238 |
| GO:0043502 | regulation of muscle adaptation | 7/238 | 44/7646 | 0,1591 | 5,111 | 4,902 | 0,000371 | 0,03888 | 0,03446 | 7 | 7/238 |
| GO:0042742 | defense response to bacterium | 10/238 | 88/7646 | 0,1136 | 3,651 | 4,483 | 0,000379 | 0,03888 | 0,03446 | 10 | 10/238 |
| GO:0072676 | lymphocyte migration | 7/238 | 45/7646 | 0,1556 | 4,997 | 4,82 | 0,000428 | 0,04204 | 0,03726 | 7 | 7/238 |
| GO:0032103 | positive regulation of response to external stimulus | 22/238 | 323/7646 | 0,06811 | 2,188 | 3,911 | 0,000436 | 0,04204 | 0,03726 | 22 | 22/238 |
| GO:1903317 | regulation of protein maturation | 6/238 | 33/7646 | 0,1818 | 5,841 | 4,995 | 0,000467 | 0,04228 | 0,03747 | 6 | 6/238 |
| GO:0050865 | regulation of cell activation | 21/238 | 303/7646 | 0,06931 | 2,227 | 3,905 | 0,000468 | 0,04228 | 0,03747 | 21 | 21/238 |
| GO:0009617 | response to bacterium | 19/238 | 261/7646 | 0,0728 | 2,339 | 3,944 | 0,000478 | 0,04228 | 0,03747 | 19 | 19/238 |
| GO:0060284 | regulation of cell development | 26/238 | 417/7646 | 0,06235 | 2,003 | 3,776 | 0,000521 | 0,04392 | 0,03893 | 26 | 26/238 |
| GO:0090183 | regulation of kidney development | 4/238 | 13/7646 | 0,3077 | 9,885 | 5,747 | 0,000524 | 0,04392 | 0,03893 | 4 | 4/238 |
| GO:0010811 | positive regulation of cell-substrate adhesion | 9/238 | 76/7646 | 0,1184 | 3,804 | 4,404 | 0,000545 | 0,0445 | 0,03944 | 9 | 9/238 |
| GO:0042060 | wound healing | 18/238 | 244/7646 | 0,07377 | 2,37 | 3,898 | 0,000575 | 0,04577 | 0,04056 | 18 | 18/238 |
| GO:0003300 | cardiac muscle hypertrophy | 7/238 | 48/7646 | 0,1458 | 4,685 | 4,59 | 0,000642 | 0,04821 | 0,04273 | 7 | 7/238 |
| GO:2000401 | regulation of lymphocyte migration | 6/238 | 35/7646 | 0,1714 | 5,507 | 4,79 | 0,00065 | 0,04821 | 0,04273 | 6 | 6/238 |
| GO:0002253 | activation of immune response | 20/238 | 289/7646 | 0,0692 | 2,223 | 3,8 | 0,000651 | 0,04821 | 0,04273 | 20 | 20/238 |
| GO:0050776 | regulation of immune response | 28/238 | 472/7646 | 0,05932 | 1,906 | 3,641 | 0,0007 | 0,04836 | 0,04286 | 28 | 28/238 |
| GO:0050832 | defense response to fungus | 4/238 | 14/7646 | 0,2857 | 9,179 | 5,49 | 0,000716 | 0,04836 | 0,04286 | 4 | 4/238 |
| GO:0014896 | muscle hypertrophy | 7/238 | 49/7646 | 0,1429 | 4,589 | 4,518 | 0,000729 | 0,04836 | 0,04286 | 7 | 7/238 |
| GO:0014897 | striated muscle hypertrophy | 7/238 | 49/7646 | 0,1429 | 4,589 | 4,518 | 0,000729 | 0,04836 | 0,04286 | 7 | 7/238 |
| GO:1990266 | neutrophil migration | 7/238 | 49/7646 | 0,1429 | 4,589 | 4,518 | 0,000729 | 0,04836 | 0,04286 | 7 | 7/238 |
| GO:0038066 | p38MAPK cascade | 6/238 | 36/7646 | 0,1667 | 5,354 | 4,694 | 0,000759 | 0,04884 | 0,04329 | 6 | 6/238 |
| GO:0055007 | cardiac muscle cell differentiation | 8/238 | 64/7646 | 0,125 | 4,016 | 4,342 | 0,000769 | 0,04884 | 0,04329 | 8 | 8/238 |
| GO:0071345 | cellular response to cytokine stimulus | 26/238 | 429/7646 | 0,06061 | 1,947 | 3,619 | 0,000798 | 0,04884 | 0,04329 | 26 | 26/238 |
| GO:0007186 | G protein-coupled receptor signaling pathway | 16/238 | 210/7646 | 0,07619 | 2,448 | 3,813 | 0,00082 | 0,04884 | 0,04329 | 16 | 16/238 |
| GO:0090257 | regulation of muscle system process | 10/238 | 97/7646 | 0,1031 | 3,312 | 4,107 | 0,000826 | 0,04884 | 0,04329 | 10 | 10/238 |
| GO:0060537 | muscle tissue development | 16/238 | 211/7646 | 0,07583 | 2,436 | 3,792 | 0,000864 | 0,04884 | 0,04329 | 16 | 16/238 |
| GO:0032102 | negative regulation of response to external stimulus | 15/238 | 191/7646 | 0,07853 | 2,523 | 3,82 | 0,000873 | 0,04884 | 0,04329 | 15 | 15/238 |
| GO:0030593 | neutrophil chemotaxis | 6/238 | 37/7646 | 0,1622 | 5,21 | 4,601 | 0,000883 | 0,04884 | 0,04329 | 6 | 6/238 |
| GO:0150117 | positive regulation of cell-substrate junction organization | 5/238 | 25/7646 | 0,2 | 6,425 | 4,87 | 0,000894 | 0,04884 | 0,04329 | 5 | 5/238 |
| GO:0061061 | muscle structure development | 22/238 | 341/7646 | 0,06452 | 2,073 | 3,632 | 0,000906 | 0,04884 | 0,04329 | 22 | 22/238 |
| GO:0006935 | chemotaxis | 15/238 | 192/7646 | 0,07812 | 2,51 | 3,798 | 0,000921 | 0,04884 | 0,04329 | 15 | 15/238 |
| GO:0042330 | taxis | 15/238 | 192/7646 | 0,07812 | 2,51 | 3,798 | 0,000921 | 0,04884 | 0,04329 | 15 | 15/238 |

**Supplementary Table 5**

| **Supplementary Table 5. Cell type-specific enrichment of 247 up-regulated differentially expressed genes across 27 placental cell types** | | | |
| --- | --- | --- | --- |
| **Cell_Type** | **pvalue** | **FDR** | **Fold_Change** |
| Fetal CD14+ Monocytes | 3,92E-18 | 1,06E-16 | 3,023 |
| Maternal CD14+ Monocytes | 1,35E-15 | 1,82E-14 | 2,832 |
| Maternal Naive CD4+ T Cells | 5,74E-08 | 5,16E-07 | 2,568 |
| Maternal FCGR3A+ Monocytes | 7,39E-06 | 4,99E-05 | 2,04 |
| Fetal Natural Killer T Cells | 1,87E-05 | 0,000101 | 2,202 |
| Maternal CD8+ Activated T Cells | 2,97E-05 | 0,000126 | 1,694 |
| Maternal Natural Killer Cells | 3,27E-05 | 0,000126 | 1,958 |
| Fetal CD8+ Activated T Cells | 0,0066 | 0,02228 | 1,475 |
| Fetal Hofbauer Cells | 0,0166 | 0,0481 | 1,798 |
| Fetal Naive CD8+ T Cells | 0,01782 | 0,0481 | 1,593 |
| Fetal B Cells | 0,04794 | 0,1079 | 1,417 |
| Maternal Plasma Cells | 0,04484 | 0,1079 | 1,427 |
| Fetal Memory CD4+ T Cells | 0,05932 | 0,1232 | 1,53 |
| Maternal Naive CD8+ T Cells | 0,09357 | 0,1805 | 1,309 |
| Fetal Naive CD4+ T Cells | 0,1709 | 0,3077 | 1,287 |
| Fetal Nucleated Red Blood Cells | 0,2152 | 0,3419 | 2,302 |
| Maternal B Cells | 0,2036 | 0,3419 | 1,183 |
| Fetal GZMK+ Natural Killer | 0,3486 | 0,523 | 1,137 |
| Fetal Plasmacytoid Dendritic | 0,4536 | 0,6446 | 1,161 |
| Fetal Endothelial Cells | 0,7808 | 0,9583 | 0,8682 |
| Fetal Fibroblasts | 0,7486 | 0,9583 | 0,8063 |
| Fetal GZMB+ Natural Killer | 0,7555 | 0,9583 | 0,8293 |
| Fetal Extravillous Trophoblasts | 0,8396 | 0,9856 | 0,8189 |
| Fetal Mesenchymal Stem Cells | 0,8813 | 0,9914 | 0,7613 |
| Fetal Cytotrophoblasts | 1 | 1 | 0,3479 |
| Fetal Prolif. Cytotrophoblasts | 1 | 1 | 0,23 |
| Fetal Syncytiotrophoblast | 1 | 1 | 0 |

## **Supplementary Figure 1**


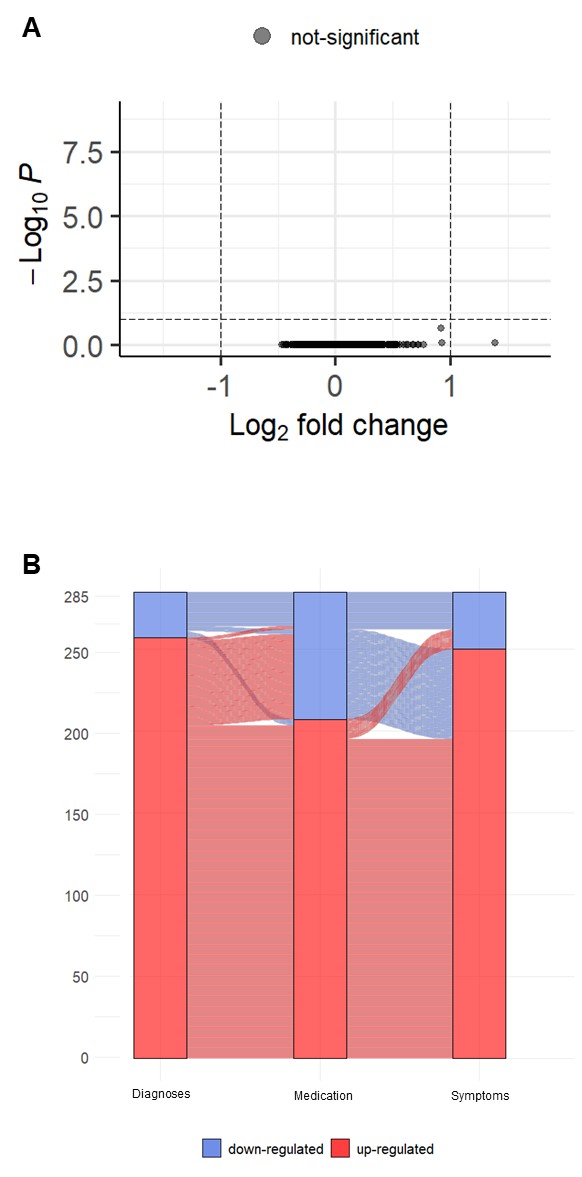


**Supplementary Figure 1. Medication-based gene expression analysis. a)** Volcano-plot of associations of antidepressant and anxiolytic medication purchases and differential gene expression in birth placenta. The x-axis denotes the log2FoldChanges (women who have purchased antidepressant and anxiolytic medication compared with those who had never purchased psychotropic medications), the y-axis -log10(p-values). **b)** Alluvial plot of 285 differentially expressed genes and the direction of their fold changes in diagnosis-, medication- and symptom-based analysis.

## **Supplementary Figure 2**


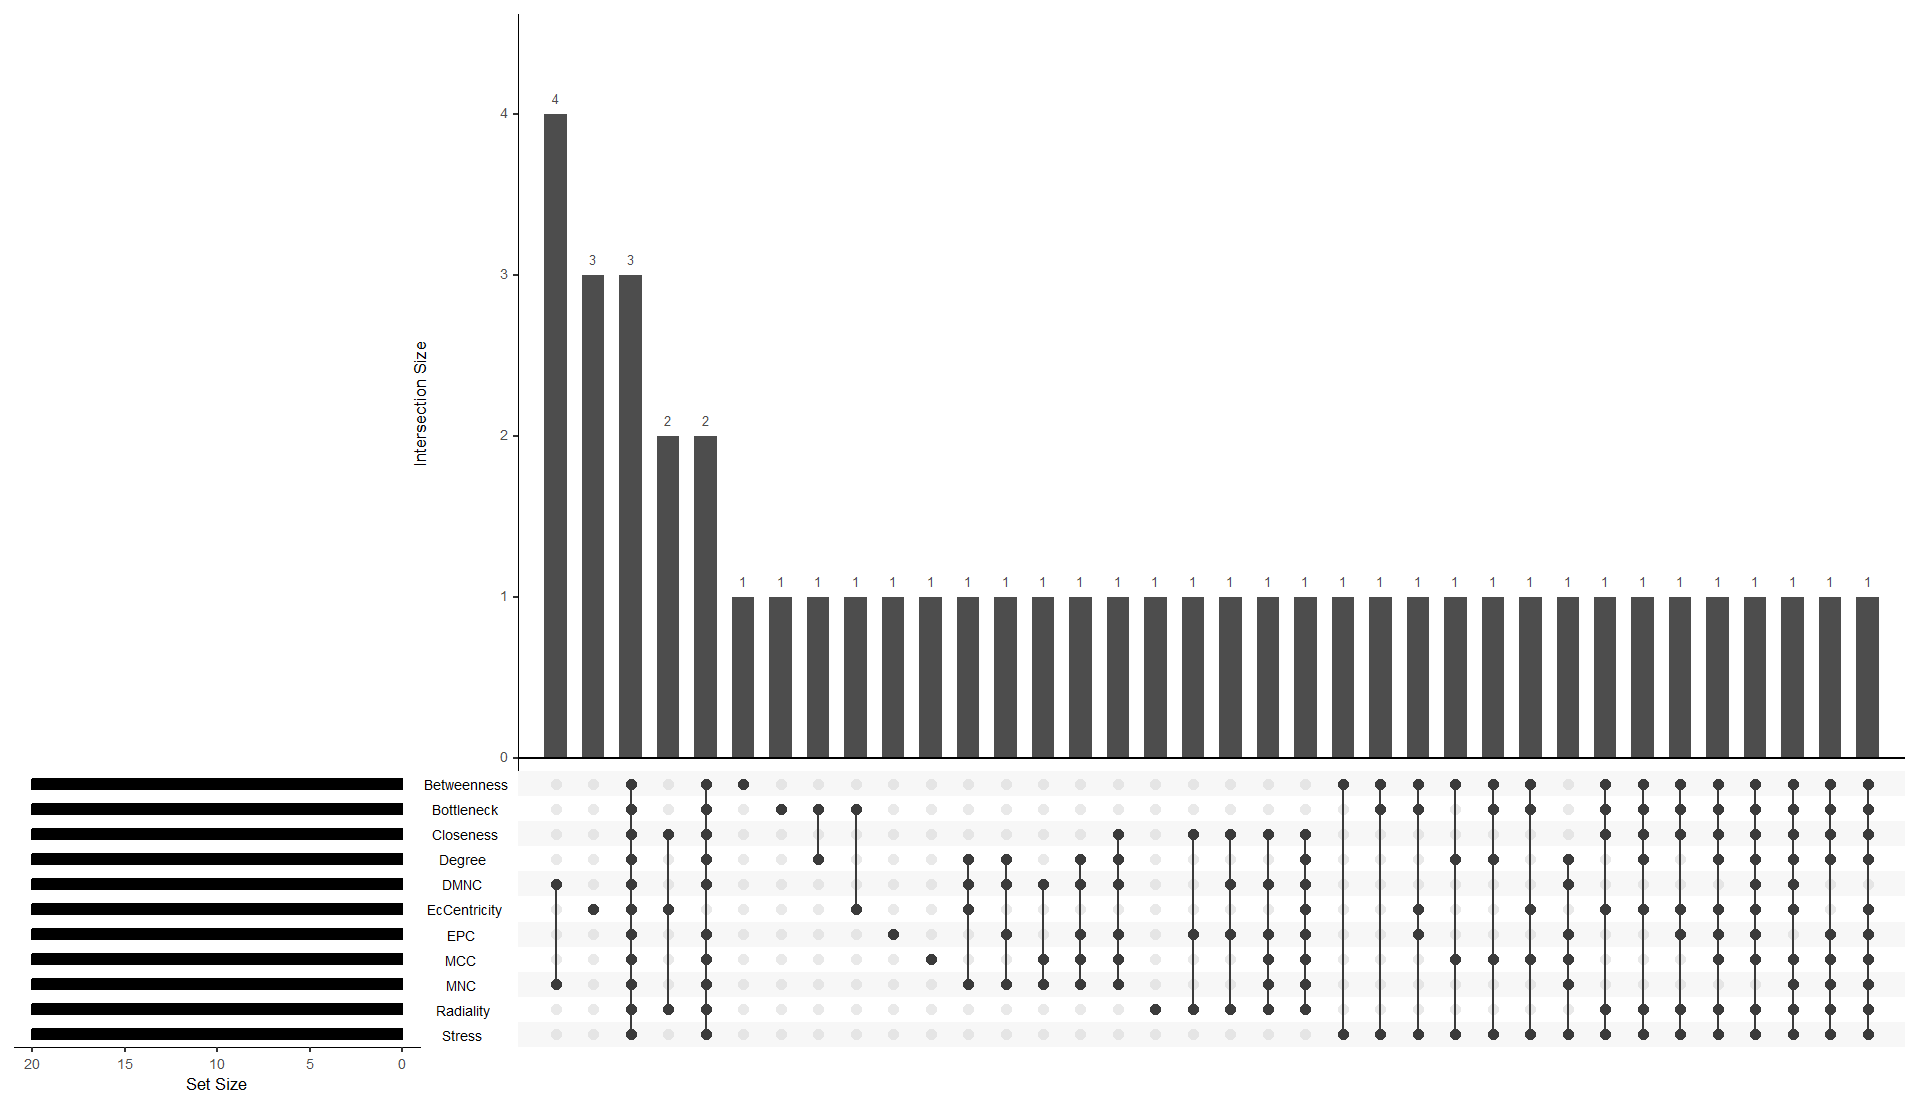


**Supplementary Figure 2. UpSet diagram of 11 algorithms determined by protein–protein interaction network analysis.** The overlapping results of 11 algorithms including Betweenness, Bottleneck, Closeness, Degree, Density of Maximum Neighborhood (DMNc), EcCentricity, Edge Percolated Component (EPC), Maximal Clique Centrality (MCC), Maximum Neighborhood Component (MNC), Radiality and Stress.

## **Supplementary Figure 3**


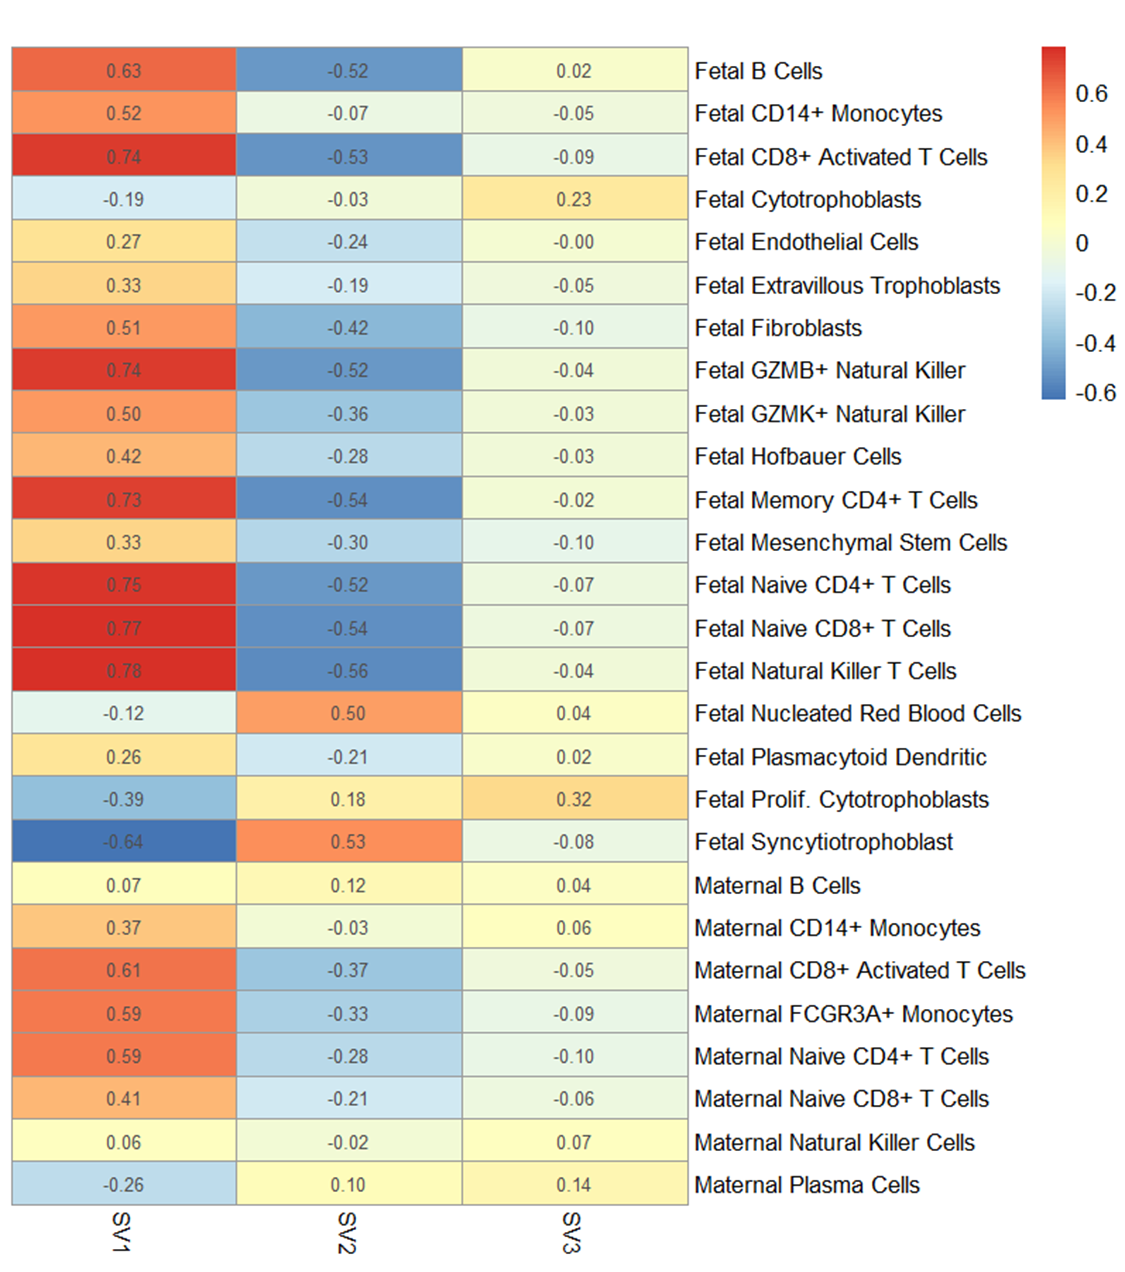


**Supplementary Figure 3. Correlation between the surrogate variables and estimated relative abundances of placental cell types.** Three surrogate variables (SV1, SV2, SV3) defined with the sva-R-package from diagnosis- and symptoms-based analysis and the relative abundances of placental cell types estimated with bisqueRNA-R-package.

## **Supplementary Figure 4**


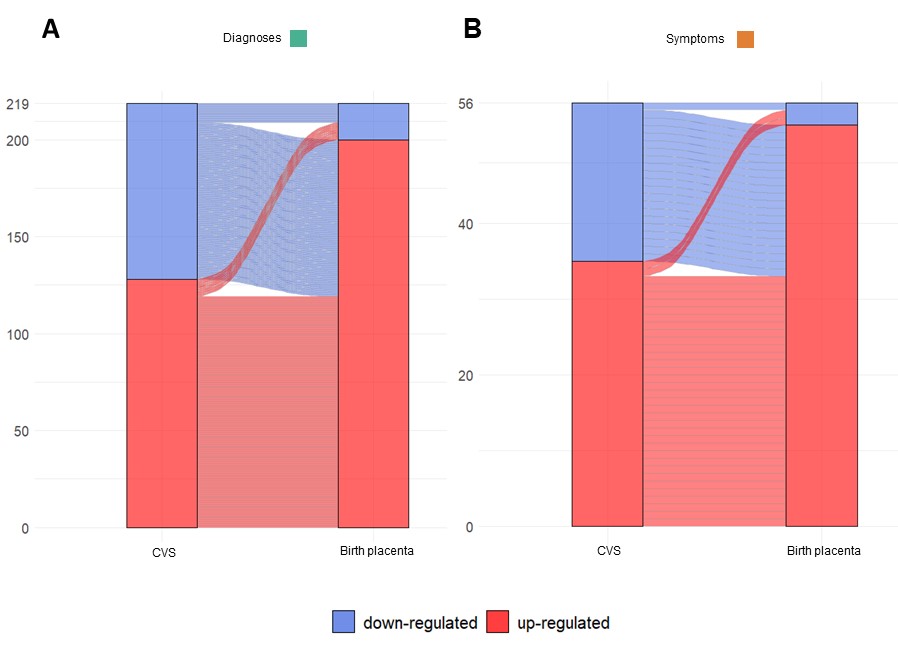


**Supplementary Figure 4. Correlation between the fold changes of differentially expressed genes from birth placenta in CVS and the birth placenta.** **a)** Alluvial diagram showing the correspondence between the fold changes of 219 differentially expressed genes from mothers with a history of depression and anxiety disorders vs. no history of mental disorders in CVS and birth placenta. **b)** Alluvial diagram showing the correspondence between the fold changes of 56 differentially expressed genes from mothers with depressive or anxiety symptoms above clinical cutoff vs. below clinical cutoff depressive or anxiety symptoms above clinical cutoff vs. below clinical cutoff in CVS and birth placenta.
